# Supplementary material for: Acute HIV-1 and SARS-CoV-2 Infections Share Slan+ Monocyte Depletion—Evidence from an Hyperacute HIV-1 Case Report
Source: MDPI journal article supplement (doi:10.3390/v13091805), 2021-09-10
Supplement: s1 [file s1]

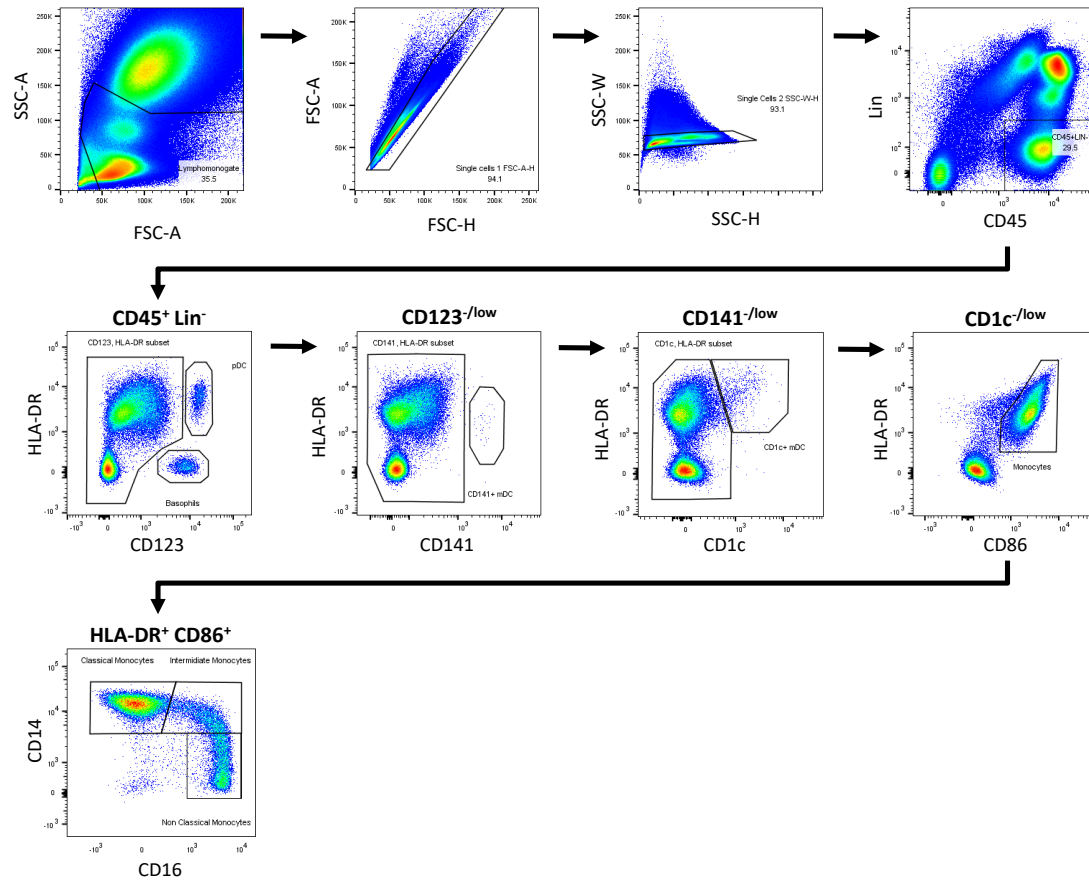

**Figure S1.** *Flow cytometry gating strategy.* Illustrative gating strategy used to identify monocyte and dendritic cells from whole blood, starting from 10 million leukocytes. Dot plots showing data from a representative healthy control.

**A**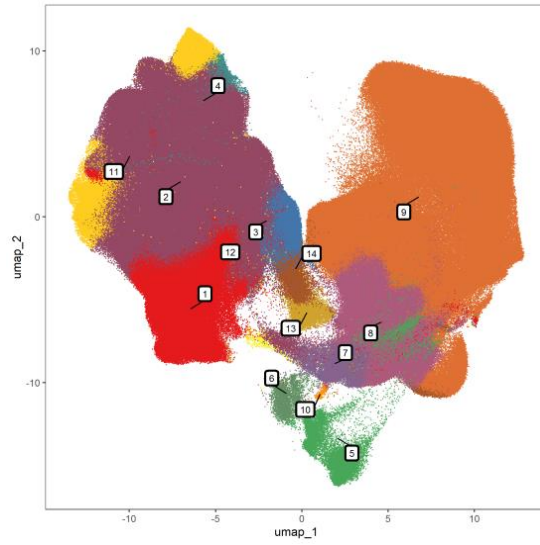**B**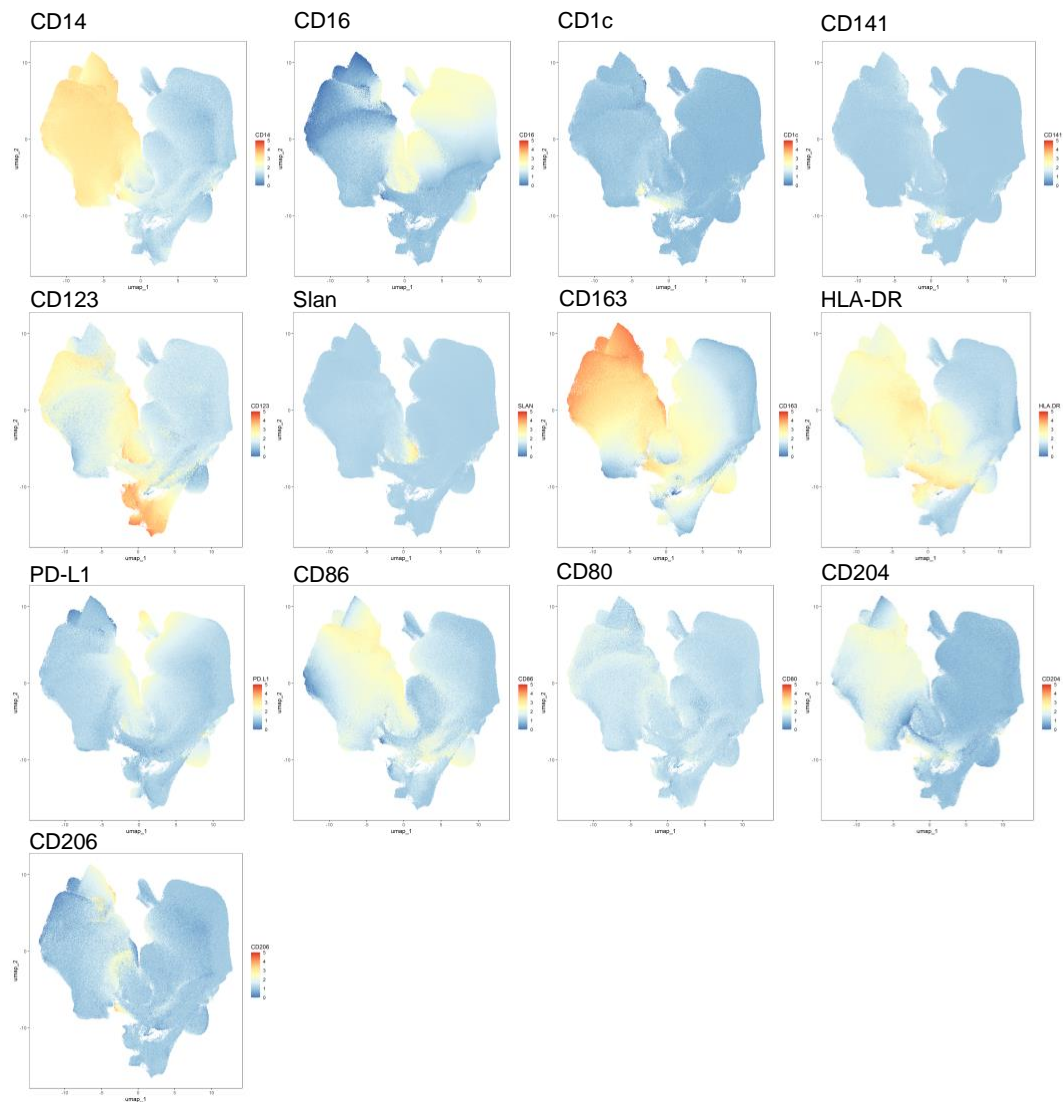

**Figure S2.** *Unsupervised analysis of monocytes and dendritic cells (A) UMAP of the CD45+Lin- dataset of all samples showing the 14 clusters obtained with FlowSOM. (B) Marker expression within the UMAP.*

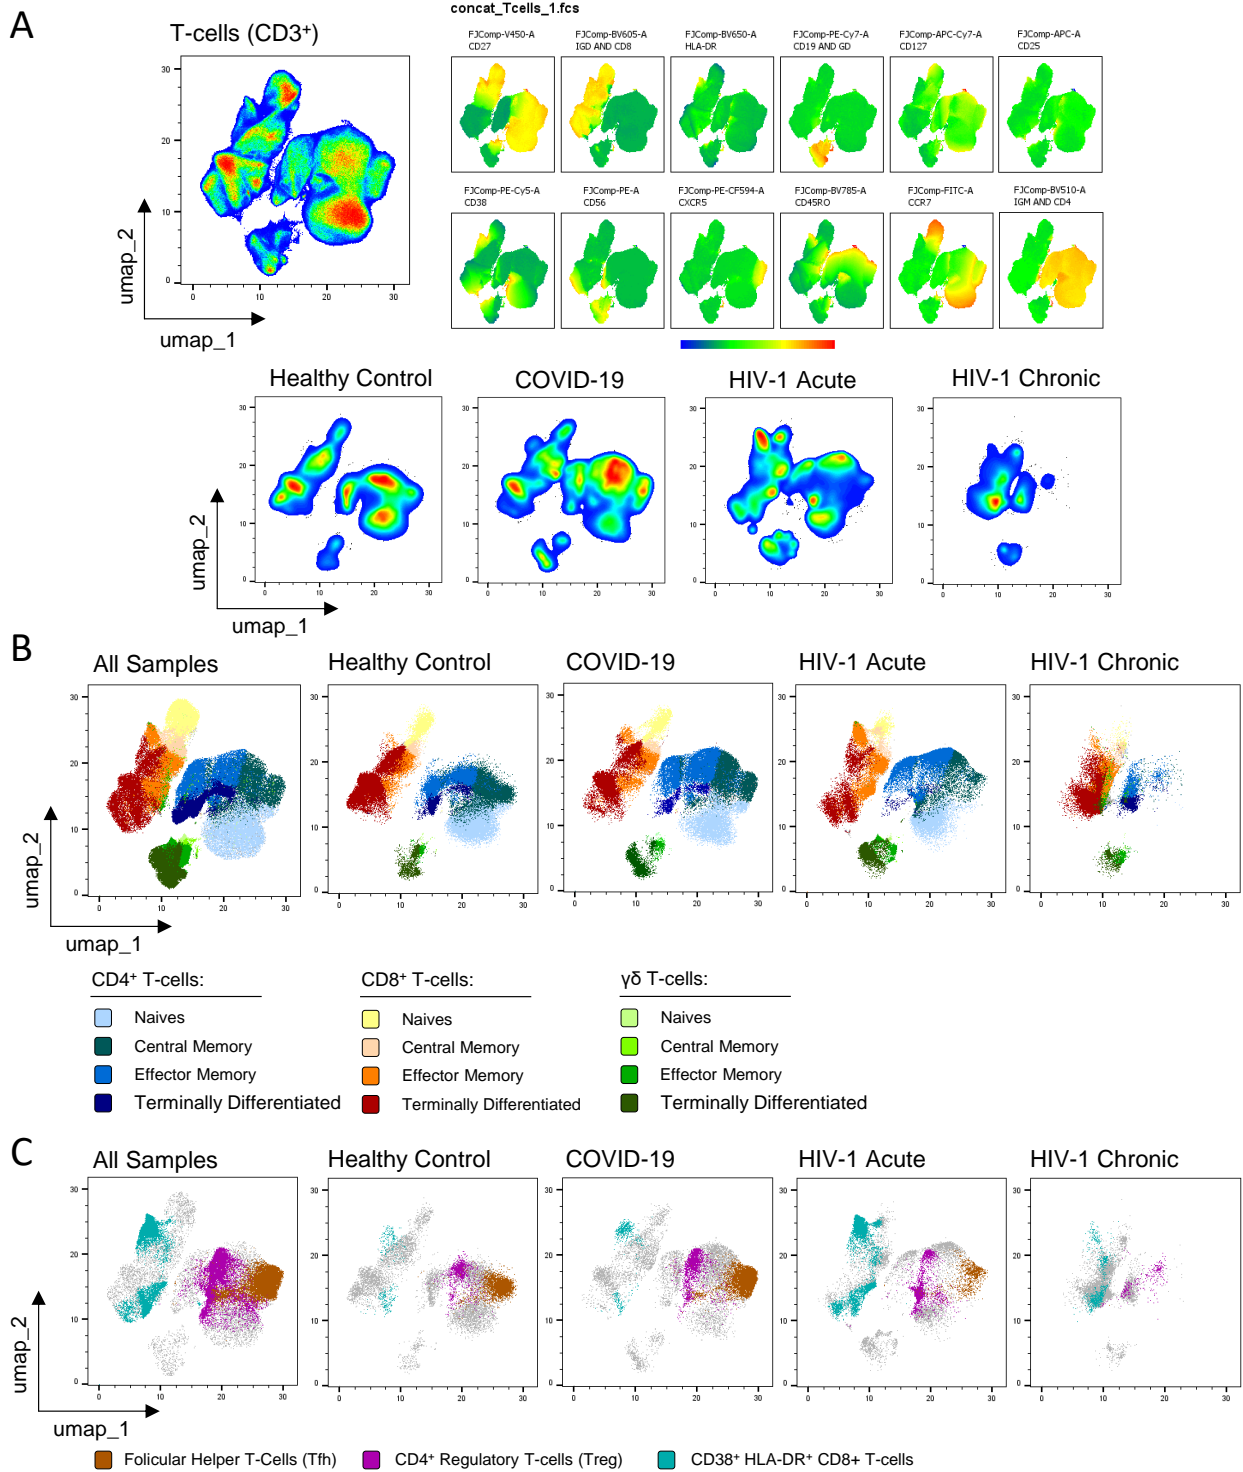

**Figure S3. Unsupervised analysis of T-cells.** (A) Marker expression within the UMAP of the CD3<sup>+</sup> cells and relative event distribution in a representative individual from the healthy control and COVID-19 groups, as well as in the untreated HIV-1 acute and HIV-1 chronic patients. (B-C) Manually annotated T-cell subsets: (B) Naïve (CCR7<sup>+</sup>CD45RO<sup>-</sup>), Central Memory (CCR7<sup>+</sup>CD45RO<sup>+</sup>), Effector Memory (CCR7<sup>-</sup>CD45RO<sup>+</sup>), Terminally Differentiated (CCR7<sup>-</sup>CD45RO<sup>-</sup>); (C) Tfh (CCR7<sup>+</sup>CD45RO<sup>+</sup>CXCR5<sup>+</sup>), Treg (CCR7<sup>-</sup>CD45RO<sup>+</sup>CD25<sup>+</sup>CD127<sup>low</sup>) and activated CD8<sup>+</sup> T-cells.

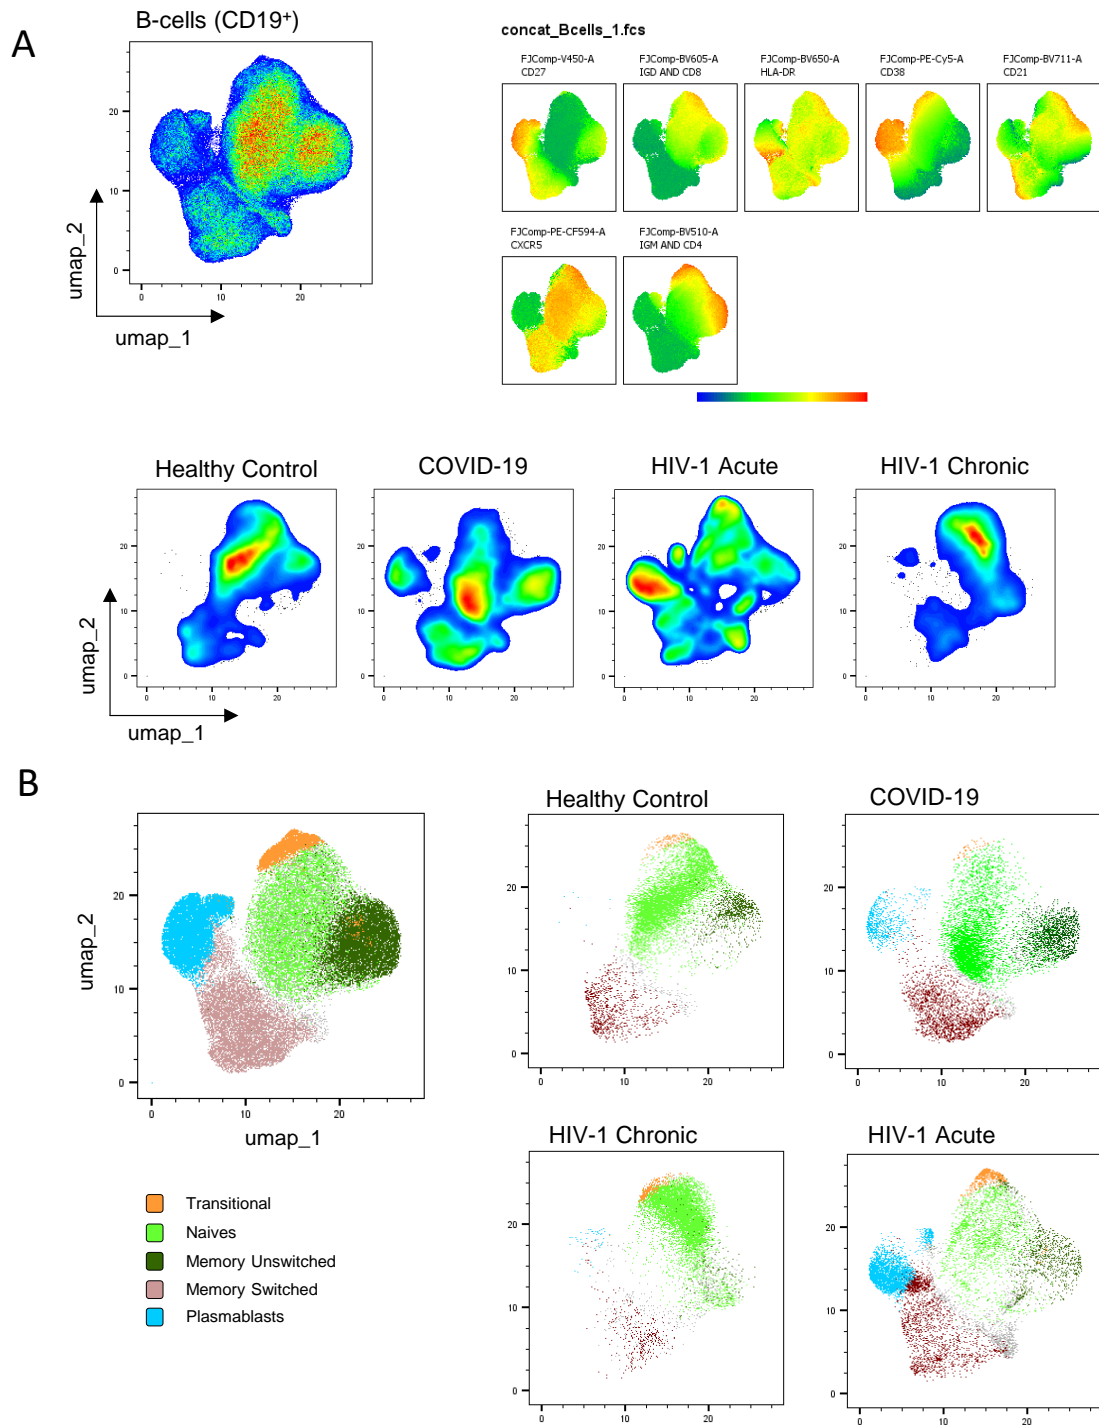

**Figure S4. Unsupervised analysis of B-cells. (A)** Marker expression within the UMAP of the CD19<sup>+</sup> cells and relative event distribution representative individual from the healthy control and COVID-19 groups, as well as in the untreated HIV-1 acute and HIV-1 chronic patients. **(B)** Manually annotated B-cell subsets : Transitional (CD38<sup>high</sup>IgM<sup>high</sup>), Naïve (IgD<sup>+</sup>IgM<sup>+</sup>CD27<sup>-</sup>), Memory Unswitched (IgD<sup>+</sup>IgM<sup>+</sup>CD27<sup>+</sup>), Memory Switched (IgD<sup>-</sup>IgM<sup>-</sup>CD27<sup>+</sup>), Plasmablasts (CD38<sup>high</sup>CD27<sup>high</sup>IgM<sup>-dim</sup>).

**Table S1. Flow-cytometry antibodies**

| <b>Antibody</b>     | <b>Fluorochrome</b> | <b>Clone</b> | <b>Source</b>             |
|---------------------|---------------------|--------------|---------------------------|
| CD27                | BV421               | M-T271       | BD Horizon                |
| Vio Blue            | Vio Blue            | DD-1         | Milteny Biotec            |
| CD141               | BV510               | 1A4          | BD Biosciences/BD Horizon |
| IgM                 | BV510               | MHM-88       | Biolegend                 |
| CD4                 | V500                | RPA-T4       | BD Horizon                |
| CD45                | BV605               | HI30         | BD Biosciences            |
| IgD                 | BV605               | IA6-2        | Biolegend                 |
| CD8 $\alpha$        | BV605               | RPA-T8       | Biolegend                 |
| HLA-DR              | BV650               | L243         | Biolegend                 |
| CD86                | BV711               | IT2.2        | Biolegend                 |
| CD21                | BV711               | B-ly4        | BD Horizon                |
| PD-L1               | BV785               | 29E2A3       | Biolegend                 |
| CD45RO              | BV785               | UCHL1        | Biolegend                 |
| CD3                 | Fitc                | $\alpha$ T3  | eBioscience/Invitrogen    |
| CD19                | Fitc                | HB19         | eBioscience/Invitrogen    |
| CD66b               | Fitc                | G10FS        | Biolegend                 |
| CCR7                | FITC                | 150503       | R&D Systems               |
| CD14                | Percp Cy5.5         | 61D3         | eBioscience/Invitrogen    |
| CD3                 | PerCP Cy5.5         | OKT3         | eBioscience               |
| CD80                | Pe                  | 2D10         | Biolegend                 |
| CD56                | PE                  | C5.9         | Cytognos                  |
| CD163               | Pe Dazzle-594       | GH1/61       | Biolegend                 |
| CXCR5               | PE Dazzle594        | J252D4       | Biolegend                 |
| CD206               | Pe-Cy5              | 15-2         | Biolegend                 |
| CD38                | PE-Cy5              | HIT2         | Biolegend                 |
| CD123               | Pe-Cy7              | 6H6          | eBioscience               |
| TCR- $\gamma\delta$ | PE-Cy7              | 11F2         | BD Biosciences            |
| CD19                | PE-Cy7              | J3-119       | Beckman Coulter           |
| CD25                | APC                 | 2A3          | BD Biosciences            |
| CD204               | Apc                 | 7C9C20       | Biolegend                 |
| CD16                | Af700               | 368          | Biolegend                 |
| CD1c                | Apc-Cy7             | L161         | Biolegend                 |
| CD127               | APC-ef780           | eBioRDR5     | Invitrogen                |
